# Supplementary material
Source: HighWire-hosted journal article supplement (https://jnm.snmjournals.org/highwire/filestream/95346/field_highwire_adjunct_files/0/213314_Supplemental_Data.pdf)
Supplement: 213314_Supplemental_Data.pdf [file 213314_Supplemental_Data.pdf]

## Chiral HPLC Separation

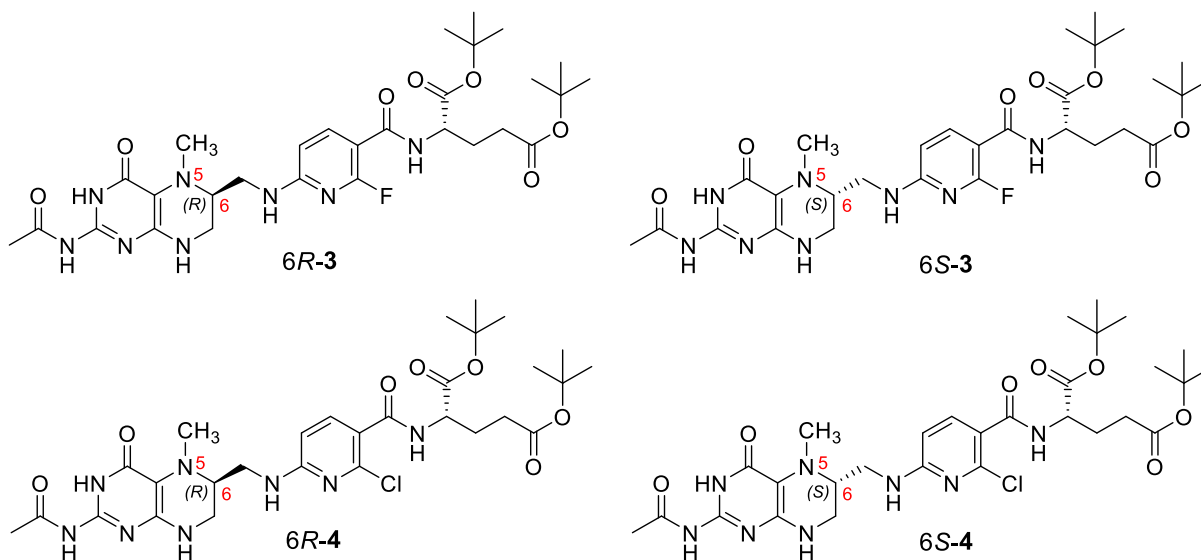

**Supplemental Figure 1:** Chemical structures of the two protected reference diastereoisomers **6R-3** and **6S-3** and the two precursor diastereoisomers **6R-4** and **6S-4**.

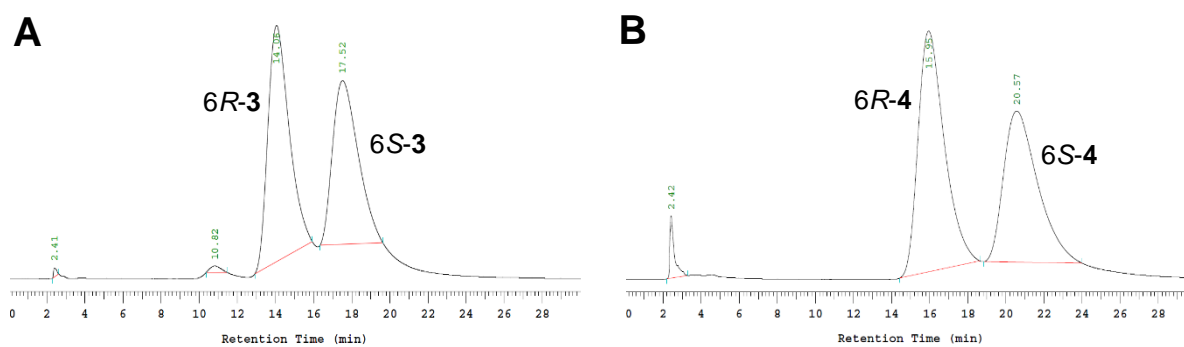

**Supplemental Figure 2:** HPLC chromatograms of the separation of **6R-3** and **6S-3** (A) and **6R-4** and **6S-4** (B) using the chiral column.

## Circular Dichroism

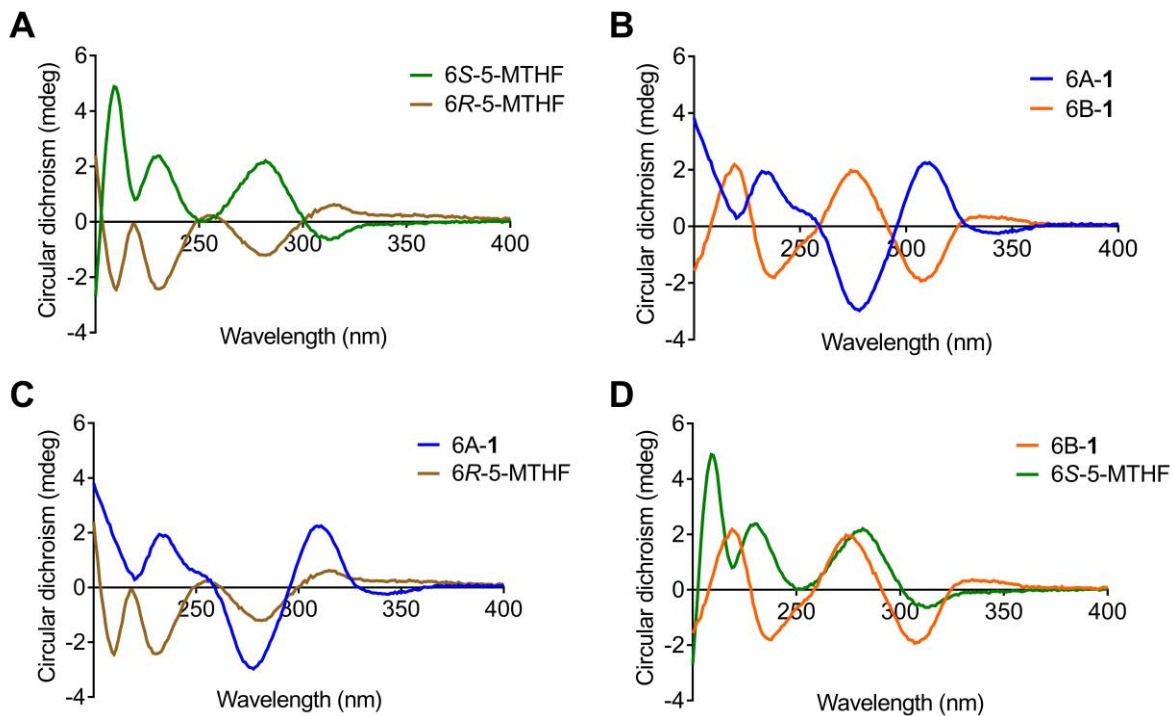

**Supplemental Figure 3:** Comparison of the CD spectra of 6R- and 6S-5-MTHF (A), 1<sup>st</sup> peak and 2<sup>nd</sup> peak of chiral HPLC separation after the hydrolysis reaction (B), 6A-1 and 6R-5-MTHF (C) and 6B-1 and 6S-5-MTHF (D) measured from 200 nm to 400 nm.

**Binding Curves**

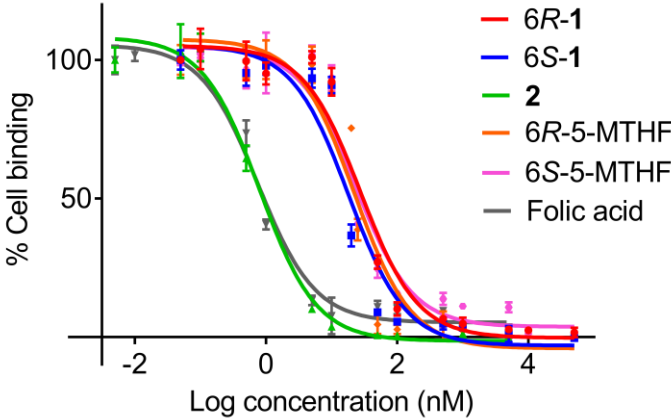

**Supplemental Figure 4:** Binding curves of 6R-1, 6S-1, 2, 6R-5-MTHF, 6S-5-MTHF and folic acid to the FR- $\alpha$ .

## Biodistribution

**Supplemental Table 1:** Biodistribution of 6R-3'-aza-2'-<sup>18</sup>F-fluoro-5-MTHF (6R-<sup>18</sup>F-1) in KB tumor-bearing mice at 0.5, 1, 1.5, 2 and 3 h p.i.<sup>a</sup>

| 6R-3'-aza-2'- <sup>18</sup> F-fluoro-5-MTHF (6R- <sup>18</sup> F-1) (% IA/g) |             |             |             |             |             |                          |
|------------------------------------------------------------------------------|-------------|-------------|-------------|-------------|-------------|--------------------------|
|                                                                              | 0.5 h p.i.  | 1 h p.i.    | 1.5 h p.i.  | 2 h p.i.    | 3 h p.i.    | 1 h p.i.<br>& Folic Acid |
|                                                                              | n = 4       | n = 4       | n = 4       | n = 4       | n = 4       | n = 3                    |
| Blood                                                                        | 3.13 ± 0.31 | 2.16 ± 0.25 | 1.92 ± 0.19 | 1.47 ± 0.09 | 1.21 ± 0.07 | 1.52 ± 0.43              |
| Heart                                                                        | 2.75 ± 0.33 | 2.38 ± 0.18 | 2.39 ± 0.47 | 1.74 ± 0.10 | 1.69 ± 0.20 | 1.60 ± 0.46              |
| Lung                                                                         | 3.37 ± 0.32 | 2.80 ± 0.29 | 2.92 ± 0.53 | 2.22 ± 0.15 | 2.20 ± 0.27 | 1.73 ± 0.43              |
| Spleen                                                                       | 8.25 ± 0.96 | 8.25 ± 0.88 | 13.0 ± 4.14 | 9.54 ± 1.54 | 13.7 ± 2.79 | 3.89 ± 0.40              |
| Liver                                                                        | 14.3 ± 1.36 | 14.1 ± 0.80 | 16.8 ± 3.58 | 14.0 ± 0.71 | 14.4 ± 1.27 | 9.64 ± 1.55              |
| Gall bladder                                                                 | 37.5 ± 11.7 | 39.0 ± 22.2 | 56.7 ± 13.2 | 108 ± 32.8  | 93.1 ± 88.4 | 26.5 ± 16.6              |
| Stomach                                                                      | 2.20 ± 0.23 | 2.35 ± 0.49 | 2.51 ± 0.42 | 2.16 ± 0.35 | 2.28 ± 1.07 | 2.02 ± 0.52              |
| Intestines                                                                   | 7.68 ± 1.28 | 6.93 ± 1.06 | 8.01 ± 2.72 | 7.57 ± 1.73 | 7.32 ± 2.16 | 5.23 ± 0.73              |
| Feces                                                                        | 12.2 ± 3.54 | 17.8 ± 5.09 | 13.1 ± 6.07 | 38.7 ± 8.88 | 16.2 ± 8.65 | 15.2 ± 1.75              |
| Salivary glands                                                              | 7.16 ± 0.51 | 6.49 ± 0.93 | 7.31 ± 1.17 | 5.17 ± 0.73 | 5.64 ± 0.84 | 2.61 ± 0.70              |
| Muscle                                                                       | 1.54 ± 0.13 | 1.36 ± 0.15 | 1.48 ± 0.31 | 1.12 ± 0.11 | 1.09 ± 0.11 | 1.05 ± 0.42              |
| Bone                                                                         | 2.73 ± 0.14 | 2.43 ± 0.10 | 3.53 ± 0.90 | 2.23 ± 0.23 | 2.79 ± 0.39 | 1.51 ± 0.34              |
| Kidneys                                                                      | 34.5 ± 2.45 | 27.3 ± 3.07 | 29.8 ± 7.46 | 21.6 ± 3.27 | 19.7 ± 0.80 | 4.80 ± 1.94              |
| KB tumor                                                                     | 13.3 ± 1.80 | 18.1 ± 2.86 | 23.9 ± 2.74 | 25.4 ± 2.95 | 32.2 ± 6.10 | 3.41 ± 0.88              |
| Tu-to-blood                                                                  | 4.27 ± 0.61 | 8.47 ± 1.62 | 12.5 ± 1.46 | 17.3 ± 1.82 | 27.0 ± 6.90 |                          |
| Tu-to-liver                                                                  | 0.94 ± 0.14 | 1.29 ± 0.18 | 1.46 ± 0.26 | 1.82 ± 0.15 | 2.22 ± 0.28 |                          |
| Tu-to-kidney                                                                 | 0.39 ± 0.05 | 0.67 ± 0.14 | 0.83 ± 0.17 | 1.19 ± 0.11 | 1.63 ± 0.32 |                          |

<sup>a</sup>values shown represent the mean ± S.D. of data from three to four animals

**Supplemental Table 2:** Biodistribution of 6*S*-3'-aza-2'-<sup>18</sup>F-fluoro-5-MTHF (6*S*-<sup>18</sup>F-1) in KB tumor-bearing mice at 0.5, 1, 1.5, 2 and 3 h p.i.<sup>a</sup>

| 6 <i>S</i> -3'-aza-2'- <sup>18</sup> F-fluoro-5-MTHF (6 <i>S</i> - <sup>18</sup> F-1) (% IA/g) |             |             |             |             |             |                          |
|------------------------------------------------------------------------------------------------|-------------|-------------|-------------|-------------|-------------|--------------------------|
|                                                                                                | 0.5 h p.i.  | 1 h p.i.    | 1.5 h p.i.  | 2 h p.i.    | 3 h p.i.    | 1 h p.i.<br>& Folic Acid |
|                                                                                                | n = 4       | n = 4       | n = 4       | n = 4       | n = 4       | n = 3                    |
| Blood                                                                                          | 1.52 ± 0.31 | 1.26 ± 0.08 | 1.16 ± 0.20 | 1.37 ± 0.39 | 1.14 ± 0.20 | 1.09 ± 0.28              |
| Heart                                                                                          | 2.02 ± 0.22 | 1.53 ± 0.15 | 1.48 ± 0.17 | 1.40 ± 0.32 | 1.41 ± 0.16 | 0.50 ± 0.13              |
| Lung                                                                                           | 2.31 ± 0.42 | 2.04 ± 0.09 | 2.08 ± 0.35 | 2.19 ± 0.34 | 2.04 ± 0.38 | 0.84 ± 0.20              |
| Spleen                                                                                         | 1.90 ± 0.34 | 1.57 ± 0.16 | 1.82 ± 0.49 | 1.86 ± 0.46 | 1.98 ± 0.24 | 0.90 ± 0.24              |
| Liver                                                                                          | 8.10 ± 1.16 | 6.28 ± 0.66 | 5.86 ± 1.11 | 5.40 ± 0.60 | 5.29 ± 0.86 | 4.76 ± 0.87              |
| Gall bladder                                                                                   | 20.0 ± 9.00 | 16.6 ± 8.91 | 11.4 ± 7.18 | 56.9 ± 45.5 | 33.2 ± 13.8 | 5.87 ± 0.45              |
| Stomach                                                                                        | 2.54 ± 0.56 | 1.84 ± 0.33 | 1.69 ± 0.33 | 1.63 ± 0.30 | 1.36 ± 0.27 | 0.73 ± 0.32              |
| Intestines                                                                                     | 2.61 ± 0.65 | 2.58 ± 0.42 | 2.34 ± 0.39 | 2.74 ± 0.51 | 2.22 ± 0.38 | 4.34 ± 0.93              |
| Feces                                                                                          | 3.71 ± 2.34 | 4.85 ± 1.95 | 4.57 ± 1.98 | 7.68 ± 4.66 | 7.53 ± 4.53 | 8.42 ± 2.10              |
| Salivary glands                                                                                | 13.8 ± 2.06 | 13.8 ± 1.28 | 21.4 ± 4.59 | 18.9 ± 4.87 | 25.9 ± 3.17 | 0.89 ± 0.26              |
| Muscle                                                                                         | 1.36 ± 0.25 | 1.29 ± 0.14 | 1.24 ± 0.14 | 1.37 ± 0.26 | 1.18 ± 0.20 | 0.26 ± 0.06              |
| Bone                                                                                           | 1.70 ± 0.13 | 1.38 ± 0.14 | 1.49 ± 0.30 | 1.37 ± 0.21 | 1.24 ± 0.16 | 0.49 ± 0.12              |
| Kidneys                                                                                        | 42.5 ± 2.73 | 37.5 ± 3.61 | 42.3 ± 7.05 | 47.0 ± 10.1 | 41.4 ± 1.27 | 2.28 ± 0.95              |
| KB tumor                                                                                       | 11.1 ± 0.90 | 14.2 ± 1.91 | 19.2 ± 4.16 | 32.2 ± 19.0 | 34.8 ± 5.97 | 2.11 ± 0.38              |
| Tu-to-blood                                                                                    | 7.41 ± 0.96 | 11.3 ± 1.13 | 16.5 ± 0.59 | 26.9 ± 21.5 | 30.9 ± 6.19 |                          |
| Tu-to-liver                                                                                    | 1.38 ± 0.16 | 1.87 ± 0.96 | 3.30 ± 0.59 | 5.93 ± 3.35 | 6.70 ± 1.48 |                          |
| Tu-to-kidney                                                                                   | 0.26 ± 0.01 | 0.38 ± 0.04 | 0.45 ± 0.07 | 0.75 ± 0.54 | 0.84 ± 0.12 |                          |

<sup>a</sup>values shown represent the mean ± S.D. of data from three to four animals.

**Supplemental Table 3:** Biodistribution of 3'-aza-2'-<sup>18</sup>F-fluorofolic acid (<sup>18</sup>F-2) in KB tumor-bearing mice at 0.5, 1, 1.5, 2 and 3 h p.i.. Data from 0.5, 1 and 1.5 h p.i. were taken from Betzel *et al.* (2013, *Bioconjug. Chem.* 24, 205-214)<sup>a</sup>

| 3'-aza-2'- <sup>18</sup> F-fluorofolic acid ( <sup>18</sup> F-2) (% IA/g) |                    |                    |                    |                    |                    |                          |
|---------------------------------------------------------------------------|--------------------|--------------------|--------------------|--------------------|--------------------|--------------------------|
|                                                                           | 0.5 h p.i.         | 1 h p.i.           | 1.5 h p.i.         | 2 h p.i.           | 3 h p.i.           | 1 h p.i.<br>& Folic Acid |
|                                                                           | n = 4              | n = 4              | n = 4              | n = 4              | n = 4              | n = 3                    |
| Blood                                                                     | 1.15 ± 0.33        | 0.55 ± 0.07        | 0.55 ± 0.06        | 0.53 ± 0.05        | 0.64 ± 0.04        | 0.82 ± 0.30              |
| Heart                                                                     | 2.09 ± 0.21        | 1.89 ± 0.28        | 1.83 ± 0.10        | 1.54 ± 0.22        | 1.58 ± 0.21        | 0.39 ± 0.20              |
| Lung                                                                      | 1.97 ± 0.31        | 1.52 ± 0.21        | 1.63 ± 0.27        | 1.91 ± 0.25        | 2.16 ± 0.39        | 0.72 ± 0.31              |
| Spleen                                                                    | 1.25 ± 0.23        | 1.85 ± 0.14        | 2.20 ± 0.16        | 2.16 ± 0.39        | 3.44 ± 0.62        | 0.37 ± 0.15              |
| Liver                                                                     | 13.7 ± 2.90        | 10.6 ± 0.89        | 10.3 ± 2.37        | 8.50 ± 1.45        | 10.3 ± 0.33        | 10.9 ± 3.39              |
| Gall bladder                                                              | 8.10 ± 2.90        | 8.40 ± 1.79        | 9.26 ± 0.59        | 6.98 ± 2.47        | 11.2 ± 5.87        | 15.8 ± 9.28              |
| Stomach                                                                   | 2.76 ± 0.45        | 2.83 ± 0.86        | 2.74 ± 0.04        | 1.93 ± 0.30        | 2.17 ± 0.30        | 0.61 ± 0.26              |
| Intestines                                                                | 1.40 ± 0.14        | 1.90 ± 0.21        | 2.26 ± 0.40        | 1.75 ± 0.06        | 2.72 ± 0.26        | 1.93 ± 0.57              |
| Feces                                                                     | 1.23 ± 0.22        | 3.03 ± 1.98        | 1.77 ± 0.25        | 2.73 ± 1.16        | 3.22 ± 2.62        | 5.98 ± 1.08              |
| Salivary glands                                                           | 9.00 ± 1.25        | 15.0 ± 6.09        | 14.1 ± 0.93        | 16.8 ± 2.64        | 14.7 ± 1.86        | 0.58 ± 0.21              |
| Muscle                                                                    | 1.74 ± 0.38        | 1.24 ± 0.18        | 1.52 ± 0.38        | 1.48 ± 0.32        | 1.67 ± 0.09        | 0.33 ± 0.12              |
| Bone                                                                      | 2.09 ± 0.32        | 1.57 ± 0.25        | 1.56 ± 0.32        | 1.56 ± 0.19        | 1.69 ± 0.10        | 0.57 ± 0.26              |
| <b>Kidneys</b>                                                            | <b>54.8 ± 6.10</b> | <b>53.6 ± 3.23</b> | <b>57.3 ± 8.40</b> | <b>51.0 ± 7.50</b> | <b>43.3 ± 5.14</b> | <b>5.89 ± 4.47</b>       |
| <b>KB tumor</b>                                                           | <b>11.7 ± 0.87</b> | <b>11.9 ± 1.73</b> | <b>12.6 ± 1.77</b> | <b>12.9 ± 0.98</b> | <b>15.0 ± 2.32</b> | <b>1.74 ± 0.35</b>       |
| Tu-to-blood                                                               | 11.1 ± 4.11        | 21.6 ± 2.33        | 23.8 ± 4.09        | 24.7 ± 2.85        | 23.4 ± 1.98        |                          |
| Tu-to-liver                                                               | 0.89 ± 0.24        | 1.13 ± 0.18        | 1.25 ± 0.35        | 1.55 ± 0.28        | 1.46 ± 0.24        |                          |
| Tu-to-kidney                                                              | 0.22 ± 0.03        | 0.22 ± 0.02        | 0.21 ± 0.04        | 0.26 ± 0.05        | 0.35 ± 0.05        |                          |

<sup>a</sup>values shown represent the mean ± S.D. of data from three to four animals.

## Metabolite Studies.

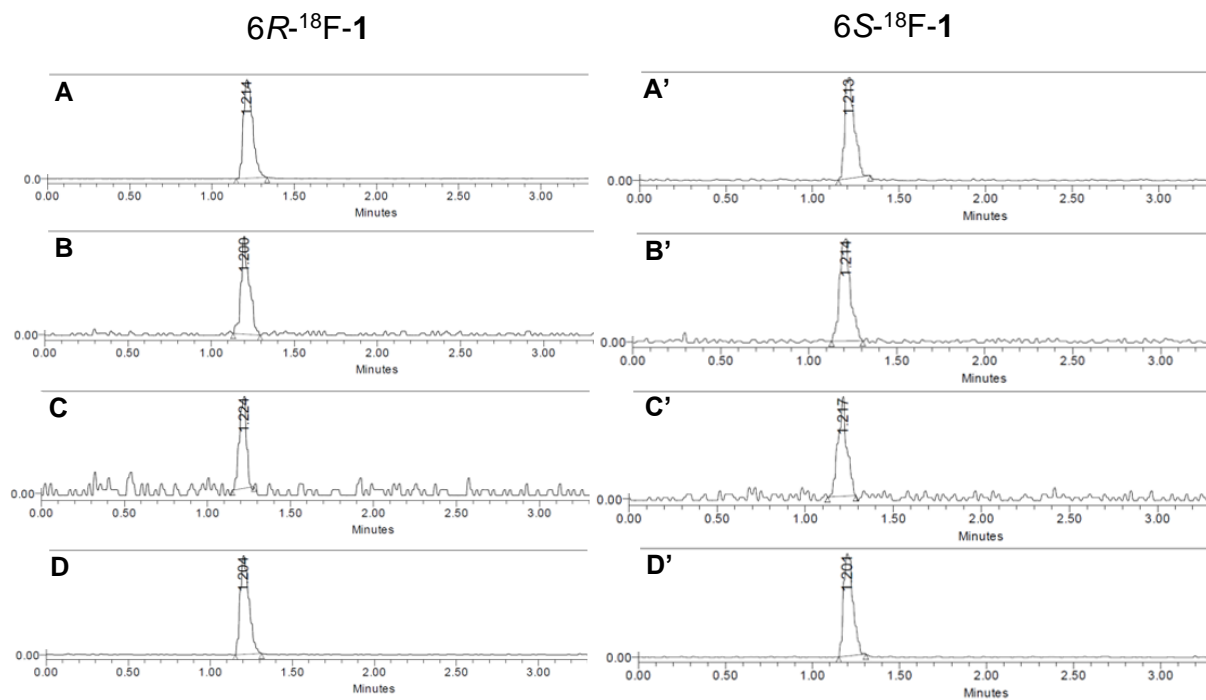

**Supplemental Figure 5:** Radio-UPLC chromatograms of reference radiotracers  $6R\text{-}^{18}\text{F}\text{-}1$  and  $6S\text{-}^{18}\text{F}\text{-}1$  (A, A'), blood plasmas (B, B'), liver samples (C, C') and urine samples (D, D') 30 min p.i. of the radiofolates. Retention times are indicated above the peak.
